# Supplementary material
Source: publisher figshare collection journal article supplement (https://sage.figshare.com/ndownloader/files/12760901)
Supplement: Supplementary file 1 [file 12760901]

## Supplementary Information

**Supplementary Figure 1.** Characterization of ald-C12-HyA, C12-HyA and ald-HyA by a) FTIR and b)  $^1\text{H}$ -NMR

a)

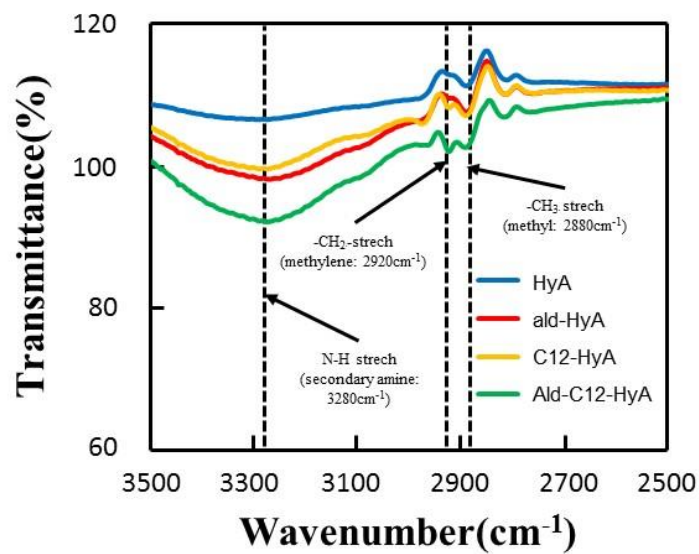

b)

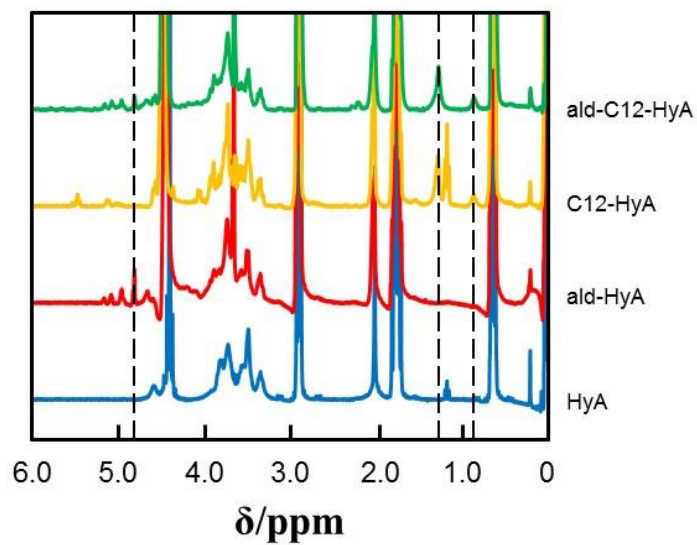

Supplementary Figure 1.

R. Mizuta et al.
